# Supplementary material
Source: PubMed Central journal article supplement (PMC4505597)
Supplement: supp_M114.622126_jbc.M114.622126-1.pdf [file supp_M114.622126_jbc.M114.622126-1.pdf]

## Supplementary Figure 1

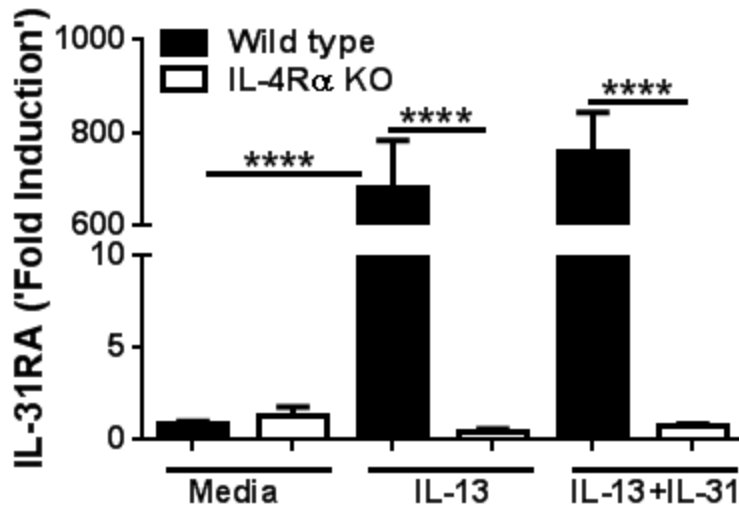

**Supplementary Figure 1. IL-31 has no effect on IL-13-induced IL-31RA expression.** Peritoneal macrophages from WT and IL-4R $\alpha$  mice were cultured with IL-13 (20ng/ml) alone or combination of IL-13 and IL-31 (200ng/ml) for 24h and expression of IL-31RA was measured using RT-PCR. Data are representative of three independent experiments and expressed as mean  $\pm$  SEM. \*\*\*\*,  $P < 0.0001$

## Supplementary Figure 2

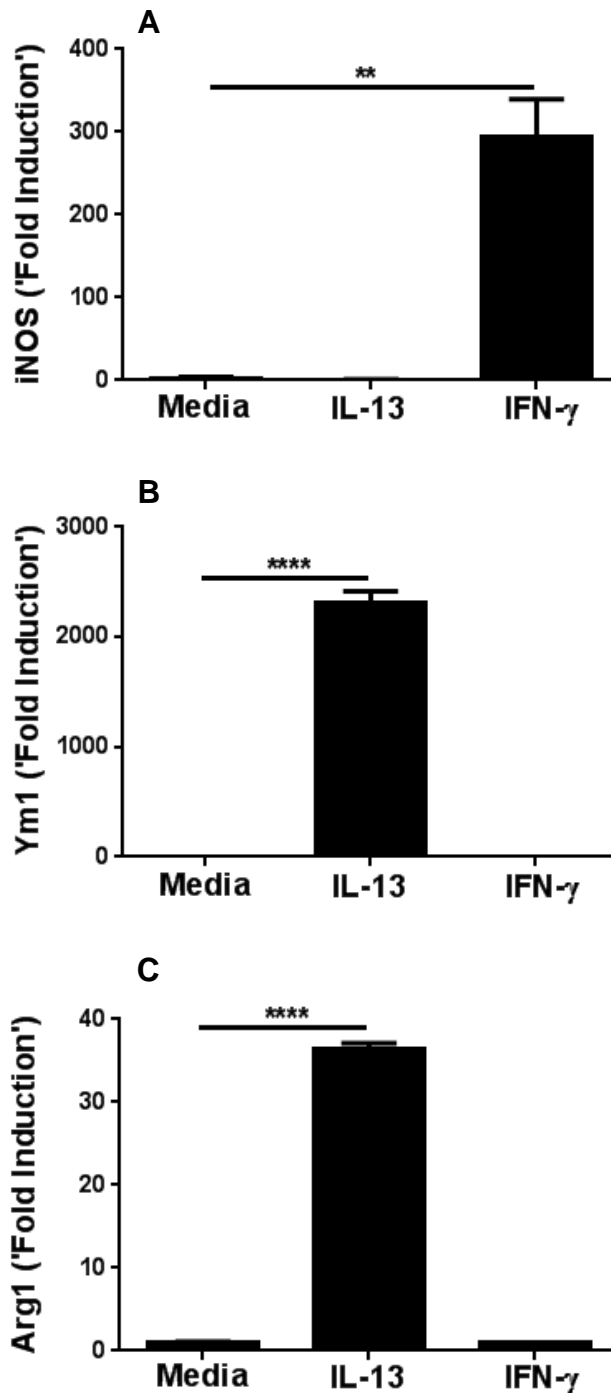

**Supplementary Figure 2. Generation and Characterization of M1 and M2 macrophages.** Peritoneal macrophages from WT mice were stimulated with IL-13 and IFN- $\gamma$  individually at 10ng/ml concentrations for 48 h. IL-13 and IFN- $\gamma$  alone had increased the expression of Arg1 and/or Ym1 and iNOS, respectively. \*\*,  $P < 0.01$ ; \*\*\*\*,  $P < 0.0001$

### Supplementary Figure 3

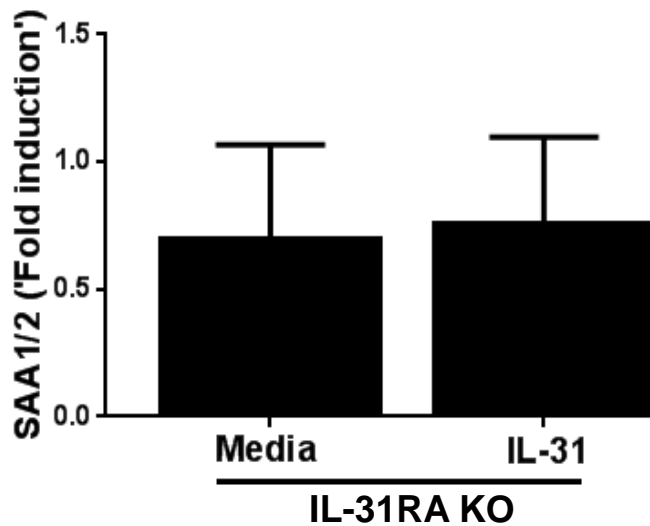

**Supplementary Figure 3. The role of Th2 cytokines on IL-31-driven expression of SAA in IL-31RA KO mice.** Peritoneal macrophages from IL-31RA KO mice were cultured with IL-4 (20ng/ml) and IL-13 (10ng/ml) for 48h. Cells were induced with IL-31 (200ng/ml) for 12h and serum amyloid A (SAA) expression was measured. Data are representative of four independent experiments and expressed as mean  $\pm$  SEM.
